# Supplementary material for: CTCF counter-regulates cardiomyocyte development and maturation programs in the embryonic heart
Source: PubMed Central journal article supplement (PMC5591014; doi:10.1371/journal.pgen.1006985), 2017-08-28
Supplement: pgen.1006985.s009.pdf [file pgen.1006985.s009.pdf]

**S1 Table.** Genotypes of live embryos obtained from ♂ *Ctcf<sup>f/+</sup>;Nkx2.5-cre<sup>tg/+</sup>* X ♀ *Ctcf<sup>f/f</sup>* crosses

| stage | genotype*                 |                           |                                                          |                                                          | total            |
|-------|---------------------------|---------------------------|----------------------------------------------------------|----------------------------------------------------------|------------------|
|       | <i>Ctcf<sup>f/+</sup></i> | <i>Ctcf<sup>f/f</sup></i> | <i>Ctcf<sup>f/+</sup>;<br/>Nkx2.5-cre<sup>tg/+</sup></i> | <i>Ctcf<sup>f/f</sup>;<br/>Nkx2.5-cre<sup>tg/+</sup></i> |                  |
| E8.5  | 2                         | 3                         | 1                                                        | 2                                                        | 8                |
| E9.5  | 26                        | 29                        | 27                                                       | 26                                                       | 108 <sup>#</sup> |
| E10.5 | 58                        | 58                        | 59                                                       | 46                                                       | 221 <sup>#</sup> |
| E11.5 | 137                       | 150                       | 132                                                      | 128                                                      | 547 <sup>§</sup> |
| E12.5 | 15                        | 20                        | 12                                                       | 14                                                       | 61               |
| E13.5 | 8                         | 9                         | 3                                                        | 0                                                        | 20               |
| E14.5 | 7                         | 6                         | 3                                                        | 0                                                        | 16               |
| E15.5 | 4                         | 2                         | 1                                                        | 0                                                        | 7                |

\* equal numbers of embryos from each genotype are expected from this cross

<sup>#</sup> includes embryos used for in situ hybridization

<sup>§</sup> includes embryos used for 4C-seq
