# Supplementary material for: CTCF counter-regulates cardiomyocyte development and maturation programs in the embryonic heart
Source: PubMed Central journal article supplement (PMC5591014; doi:10.1371/journal.pgen.1006985), 2017-08-28
Supplement: pgen.1006985.s010.pdf [file pgen.1006985.s010.pdf]

**S2 Table.** Quantification of double positive CT3-CTCF nuclei in E9.5 mutant hearts

| <b><i>Ctcf</i><sup>f/f</sup>;<i>Nkx2.5-Cre</i> E9.5</b> |               |                 |
|---------------------------------------------------------|---------------|-----------------|
| <b>sample*</b>                                          | <b>nuclei</b> | <b>CTCF + #</b> |
| 1                                                       | 684           | 302             |
| 1                                                       | 661           | 455             |
| 1                                                       | 635           | 349             |
| 1                                                       | 630           | 396             |
| 1                                                       | 593           | 171             |
| 2                                                       | 550           | 245             |
| 2                                                       | 559           | 283             |
| 2                                                       | 560           | 433             |
| 2                                                       | 538           | 133             |
| 2                                                       | 427           | 217             |
| 3                                                       | 515           | 111             |
| 3                                                       | 515           | 116             |
| 3                                                       | 558           | 271             |
| 3                                                       | 523           | 199             |
| 3                                                       | 505           | 238             |
| <b><i>total</i></b>                                     | <b>8453</b>   | <b>3919</b>     |

\* sample refers to independent embryos from which 5 sections were quantified

# only CT3 positive nuclei were scored for CTCF

(in control embryos, all CT3 positive cells are also CTCF positive)
