# Supplementary material for: CTCF counter-regulates cardiomyocyte development and maturation programs in the embryonic heart
Source: PubMed Central journal article supplement (PMC5591014; doi:10.1371/journal.pgen.1006985), 2017-08-28
Supplement: pgen.1006985.s011.pdf [file pgen.1006985.s011.pdf]

**S3 Table.** Quantification of proliferation and apoptosis in E10.5-E11.5 control and mutant hearts

| control E10.5 |              |       |        |
|---------------|--------------|-------|--------|
| sample*       | CT3 + nuclei | PH3 + | TUNEL+ |
| 1             | 785          | 6     | 0      |
| 1             | 894          | 28    | 0      |
| 1             | 618          | 82    | 0      |
| 1             | 588          | 48    | 0      |
| 1             | 650          | 8     | 0      |
| 2             | 866          | 12    | 0      |
| 2             | 997          | 14    | 0      |
| 2             | 1007         | 34    | 0      |
| 2             | 930          | 192   | 1      |
| 2             | 689          | 16    | 0      |
| 3             | 897          | 31    | 0      |
| 3             | 954          | 9     | 0      |
| 3             | 842          | 11    | 0      |
| 3             | 819          | 89    | 1      |
| 3             | 878          | 91    | 0      |

| <i>Ctcf<sup>fl/fl</sup>;Nkx2.5-Cre</i> E10.5 |              |       |        |
|----------------------------------------------|--------------|-------|--------|
| sample*                                      | CT3 + nuclei | PH3 + | TUNEL+ |
| 1                                            | 1081         | 11    | 0      |
| 1                                            | 745          | 11    | 0      |
| 1                                            | 837          | 142   | 1      |
| 1                                            | 735          | 27    | 0      |
| 1                                            | 777          | 16    | 0      |
| 2                                            | 1205         | 19    | 0      |
| 2                                            | 1091         | 28    | 0      |
| 2                                            | 1101         | 13    | 0      |
| 2                                            | 1216         | 44    | 0      |
| 2                                            | 1154         | 160   | 0      |
| 3                                            | 1284         | 30    | 0      |
| 3                                            | 1533         | 19    | 3      |
| 3                                            | 1466         | 19    | 3      |
| 3                                            | 728          | 17    | 1      |
| 3                                            | 910          | 21    | 1      |

| control E11.5 |              |       |        |
|---------------|--------------|-------|--------|
| sample*       | CT3 + nuclei | PH3 + | TUNEL+ |
| 1             | 1676         | 287   | 0      |
| 1             | 1841         | 119   | 1      |
| 1             | 918          | 102   | 0      |
| 1             | 738          | 110   | 0      |
| 1             | 1636         | 251   | 0      |
| 2             | 2376         | 270   | 5      |
| 2             | 1759         | 175   | 2      |
| 2             | 1425         | 129   | 2      |
| 2             | 1658         | 271   | 2      |
| 2             | 1810         | 264   | 1      |
| 3             | 2034         | 108   | 4      |
| 3             | 2039         | 130   | 0      |
| 3             | 1958         | 268   | 0      |

| <i>Ctcf<sup>fl/fl</sup>;Nkx2.5-Cre</i> E11.5 |              |       |        |
|----------------------------------------------|--------------|-------|--------|
| sample*                                      | CT3 + nuclei | PH3 + | TUNEL+ |
| 1                                            | 1883         | 85    | 6      |
| 1                                            | 2021         | 180   | 3      |
| 1                                            | 1391         | 282   | 2      |
| 1                                            | 2083         | 279   | 0      |
| 1                                            | 2014         | 397   | 6      |
| 2                                            | 1810         | 260   | 1      |
| 2                                            | 2028         | 101   | 1      |
| 2                                            | 1637         | 114   | 3      |
| 2                                            | 1399         | 249   | 4      |
| 2                                            | 1696         | 151   | 2      |
| 3                                            | 1787         | 111   | 2      |
| 3                                            | 1539         | 139   | 0      |
| 3                                            | 1475         | 84    | 1      |

\* sample refers to independent embryos from which 3-5 sections were quantified
