# Supplementary material for: CTCF counter-regulates cardiomyocyte development and maturation programs in the embryonic heart
Source: PubMed Central journal article supplement (PMC5591014; doi:10.1371/journal.pgen.1006985), 2017-08-28
Supplement: pgen.1006985.s015.pdf [file pgen.1006985.s015.pdf]

**S7 Table.** Motif discovery in proximal and distal CTCF peaks of dysregulated genes in *Ctcf<sup>fl/fl</sup>;Nkx2.5-cre<sup>tg/+</sup>* E10.5 hearts

|                     |                 | <i>de novo</i> motifs | p-val    | known motifs  | adj p-val  |
|---------------------|-----------------|-----------------------|----------|---------------|------------|
| <b>development</b>  | <b>proximal</b> | <i>none</i>           |          | CTCF          | 0,001      |
|                     | <b>distal</b>   | BORIS*                | 1,00E-11 | CTCF / BORIS* | 0 / 0      |
| <b>translation</b>  | <b>proximal</b> | <i>none</i>           |          | CTCF / BORIS* | 0 / 0      |
|                     | <b>distal</b>   | RPN4**                | 1,00E-13 | CTCF / BORIS* | 0 / 0,0001 |
| <b>mitochondria</b> | <b>proximal</b> | BORIS                 | 1,00E-15 | CTCF / BORIS* | 0 / 0      |
|                     | <b>distal</b>   | <i>none</i>           |          | CTCF          | 0,0001     |

\* CTCF-like factor

\*\* Yeast C2H2 zinc-finger factor; second best match to the *de novo* motif is CTCF
