# Supplementary material for: CTCF counter-regulates cardiomyocyte development and maturation programs in the embryonic heart
Source: PubMed Central journal article supplement (PMC5591014; doi:10.1371/journal.pgen.1006985), 2017-08-28
Supplement: pgen.1006985.s016.pdf [file pgen.1006985.s016.pdf]

**S8 Table.** Primers and oligonucleotides used in this study

| Genotyping primers |                          |                                           |
|--------------------|--------------------------|-------------------------------------------|
| Primer             | Sequence                 | Notes                                     |
| lacZ_F             | GCGACTTCCAGTTCAACATC     | genotyping of transgenic embryos          |
| lacZ_R             | GATGAGTTTGGACAAACCAC     | genotyping of transgenic embryos          |
| Myogenin_F         | CCAAGTTGGTGTCAAAGCC      | control for transgenic genotyping         |
| Myogenin_R         | CTCTCTGCTTTAAGGAGTCAG    | control for transgenic genotyping         |
| NKX2.5-Cre         | GATGACTCTGGTCAGAGATACCTG | Forward for <i>Nkx2.5-Cre</i> allele      |
| NKX-S              | GCCCTGTCCCTCAGATTTACACC  | Forward for <i>Nkx2.5</i> wildtype allele |
| Nkx-AS             | GCGCACTCACTTTAATGGGAAGAG | Reverse common primer for <i>Nkx2.5</i>   |
| p8563              | CTAGGAGTGTAGTTCAGTGAGGCC | Forward common primer for <i>Ctcf</i>     |
| p8946              | GCTCTAAAGAAGGTTGTGAGTTC  | Reverse for <i>Ctcf</i> wildtype allele   |
| p261               | CGGCATCAGAGCAGCCGATTG    | Reverse for <i>Ctcf</i> floxed allele     |
| p260               | TGTCACTAATCTCCACCTCACAG  | Reverse for <i>Ctcf</i> deleted allele    |
| CTCFdel_F          | AGGCCTTTAGCAGGAACCTC     | genotyping of CRISPR/Cas9 deletion        |
| CTCFdel_R          | CGATCCTGGAACAGGAAAA      | genotyping of CRISPR/Cas9 deletion        |

\* F stands for forward primer and R stands for reverse primer

| Primers for in situ hybridization probe generation |                       |
|----------------------------------------------------|-----------------------|
| Primer                                             | Sequence              |
| <i>Tnni2_F</i>                                     | ACGTGGCTGAAGAGGAGAAA  |
| <i>Tnni2_R</i>                                     | TATTGGAGCGAGGCCAAGTA  |
| <i>Tnni3_F</i>                                     | GAGACCTCCAAGGTCACCAG  |
| <i>Tnni3_R</i>                                     | TTAAACTTGCCACGGAGGTC  |
| <i>Tnnt1_F</i>                                     | TGCACTAAAAGACCGCATTG  |
| <i>Tnnt1_R</i>                                     | TGGGGGCACTTTATTTTGAG  |
| <i>Tnnt3_F</i>                                     | GAAACCAAGACCCAAACTTAC |
| <i>Tnnt3_R</i>                                     | TTTATTCCTAGACCCCAGAAG |
| <i>Ndufs6_F</i>                                    | GGTTTCGGGGTTCAAGTGT   |
| <i>Ndufs6_R</i>                                    | TGGTGGGAGCATCCTTTATT  |
| <i>Hopx_F</i>                                      | AGCAGACGCAGAAATGGTTT  |
| <i>Hopx_R</i>                                      | CCCCTGCCTGTTCTGTTATC  |
| SP6 promoter                                       | ATTTAGGTGACACTATAGAA  |
| T7 promoter                                        | GTAATACGACTCACTATAGGG |

\* F stands for forward primer and R stands for reverse primer

| 4C viewpoint primers   |                                                       |
|------------------------|-------------------------------------------------------|
| Primer                 | Sequence                                              |
| <i>Irx4</i> _DpnII     | TCCGGCGCAAGAGCGATC                                    |
| <i>Irx4</i> _Csp6      | GTAAGCGGATGGGAAGGAC                                   |
| <i>Ndufs6</i> _DpnII   | AGCATGTGTTGTTTGGGATC                                  |
| <i>Ndufs6</i> _Csp6    | AACACTGCGCACAGTTAAGC                                  |
| CTCF BS_DpnII          | TGGAACCCACAGTGCTGATC                                  |
| CTCF BS_Csp6           | ACCAGCAAATTAATCTACAAGGC                               |
| Adaptor reading primer | AATGATACGGCGACCACCGAACACTCTTTCCCTACACGACGCTCTTCCGATCT |
| Adaptor non reading    | CAAGCAGAAGACGGCATAACGA                                |

\*The reading primers have DpnII and non reading primers have Csp6

| Oligos for Guide RNAs |                                 |                         |
|-----------------------|---------------------------------|-------------------------|
| Oligos                | Sequence                        | Location                |
| g5.3                  | GGCGTCCAATTGACAAATTG / PAM: TGG | chr13:73297211-73297230 |
| g3                    | CTTGTCCTGCGGTCCAAC / PAM: TGG   | chr13:73298566-73298585 |
